# Supplementary material for: RNA-SeQC: RNA-seq metrics for quality control and process optimization
Source: PubMed Central journal article supplement — Bioinformatics. 2012 Apr 25;28(11):1530–2. doi: 10.1093/bioinformatics/bts196 (PMC3356847; doi:10.1093/bioinformatics/bts196), 2012-04-25
Supplement: supp_bts196_Supplement-Tool_Comparison.pdf [file supp_bts196_Supplement-Tool_Comparison.pdf]

## RNA-seq Quality Control Tool Comparison

| Features                                | RNA-SeQC                                  | EVER-seq                              | CollectRNASeqMetrics            |
|-----------------------------------------|-------------------------------------------|---------------------------------------|---------------------------------|
| Version                                 | 1.1.0                                     | 1.0.6                                 | 0.1.18                          |
| Total and Duplicate Read Counts         | Yes                                       | Yes                                   | Yes                             |
| Mapping Rate                            | Yes                                       | Yes                                   | Yes                             |
| Read Pairing Stats                      | Yes                                       | Yes                                   | w/ additional tool <sup>a</sup> |
| Exon, Intron, Intergenic Rate           | Yes                                       | Yes                                   | Yes                             |
| Strand Specificity Quantification       | Yes                                       | Yes                                   | Yes                             |
| Normalization by Downsampling           | Yes                                       | No                                    | No                              |
| Provides RPKM                           | Yes                                       | No                                    | No                              |
| Coefficient of Variation of Coverage    | Yes                                       | No                                    | Yes                             |
| 3' / 5' Coverage Ratios                 | Yes                                       | No                                    | No                              |
| Gaps in Coverage Report                 | Yes                                       | No                                    | No                              |
| Stratification by Expression            | Yes                                       | No                                    | No                              |
| NCV Plot (nucleotide distribution)      | No                                        | Yes                                   | No                              |
| Average Transcript Coverage Plot        | Yes                                       | Yes                                   | Yes                             |
| Coverage Plot - Dist. From 3' End       | Yes                                       | No                                    | No                              |
| MA Plot                                 | No                                        | Yes                                   | No                              |
| Expression Standard Error               | Read counts given                         | Yes                                   | No                              |
| Clipping Profile                        | No                                        | Yes                                   | No                              |
| Alignment Mismatch Rate per Base        | Yes                                       | No                                    | w/ additional tool <sup>a</sup> |
| Report Paired End vs. Single End        | No                                        | Yes                                   | No                              |
| Fragment size distribution              | Yes                                       | Yes                                   | No                              |
| rRNA content                            | Re-alignment or interval method           | No                                    | Interval Method                 |
| Summarizes metrics for multiple samples | Yes                                       | No                                    | No                              |
| Expression Correlation to Arrays        | Yes                                       | No                                    | No                              |
| Expression Correlation to RNA-seq       | Yes                                       | 2 Sample Max.                         | No                              |
| GC Content Bias Assessment              | Coverage metrics stratified by GC content | Provides histogram of read GC content | None                            |
| Peer Reviewed                           | Yes                                       | No                                    | No                              |

<sup>a</sup> CollectRNASeqMetrics is part of the Picard package of tools, some of which include these additional features.

|                      |                                                                                             |
|----------------------|---------------------------------------------------------------------------------------------|
| RNA-SeQC:            | <a href="http://www.broadinstitute.org/rna-seqc">http://www.broadinstitute.org/rna-seqc</a> |
| EVER-seq             | <a href="http://code.google.com/p/ever-seq">http://code.google.com/p/ever-seq</a>           |
| CollectRNASeqMetrics | <a href="http://picard.sourceforge.net">http://picard.sourceforge.net</a>                   |
